# Supplementary material
Source: PubMed Central journal article supplement (PMC9720890)

Supplemental Figure 1.

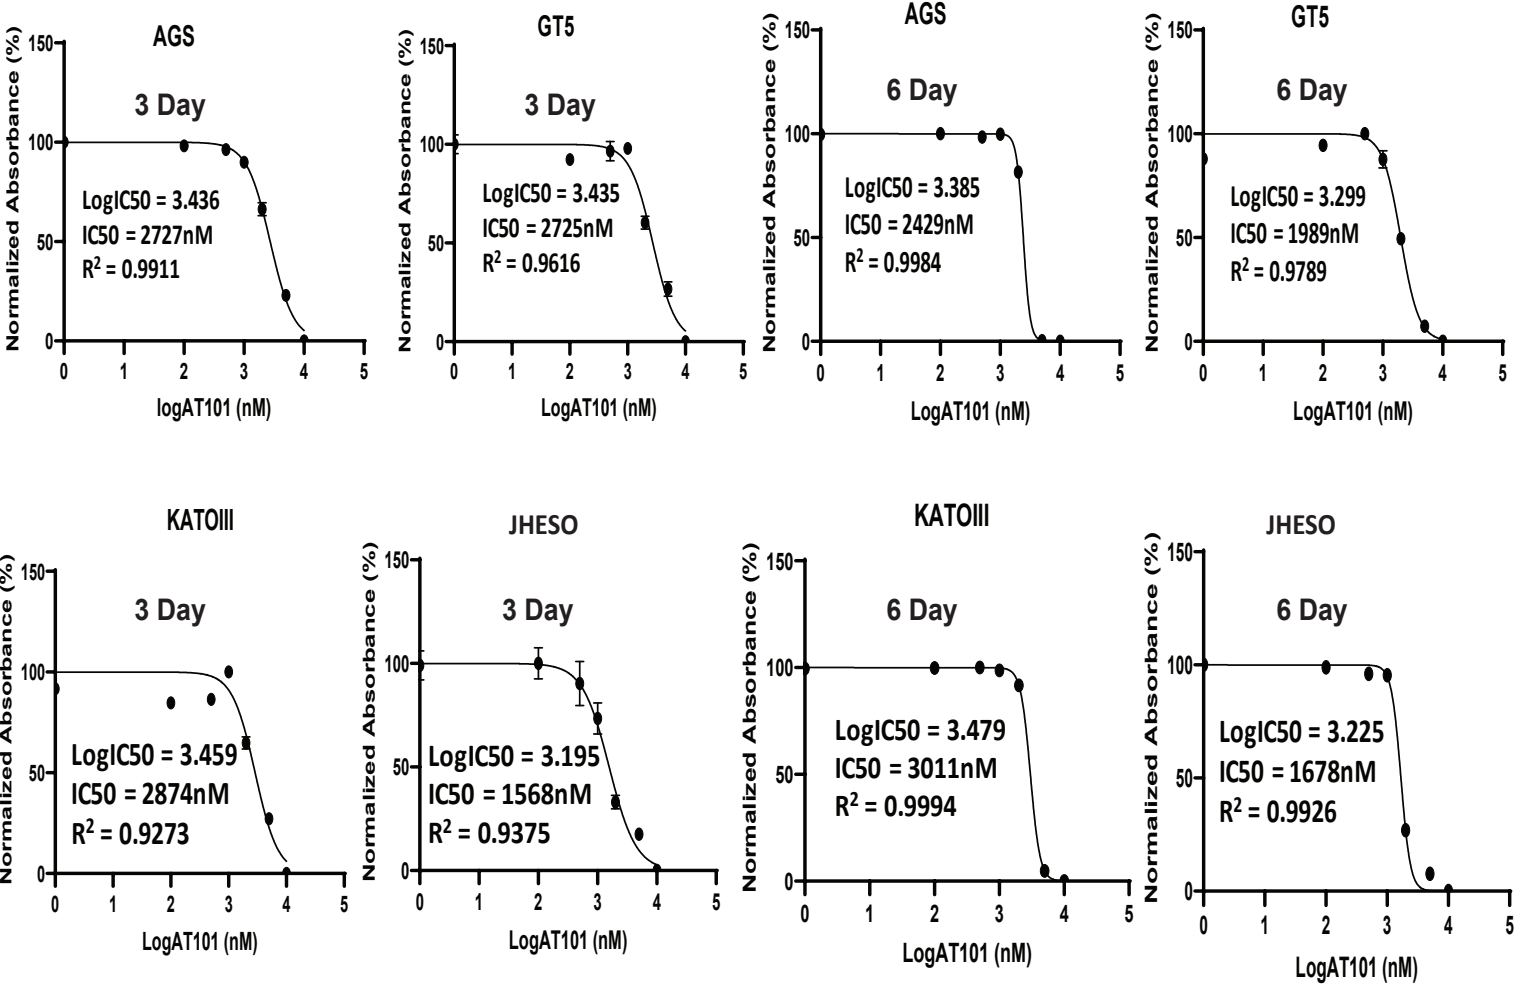

# Supplemental Figure 2.

A.

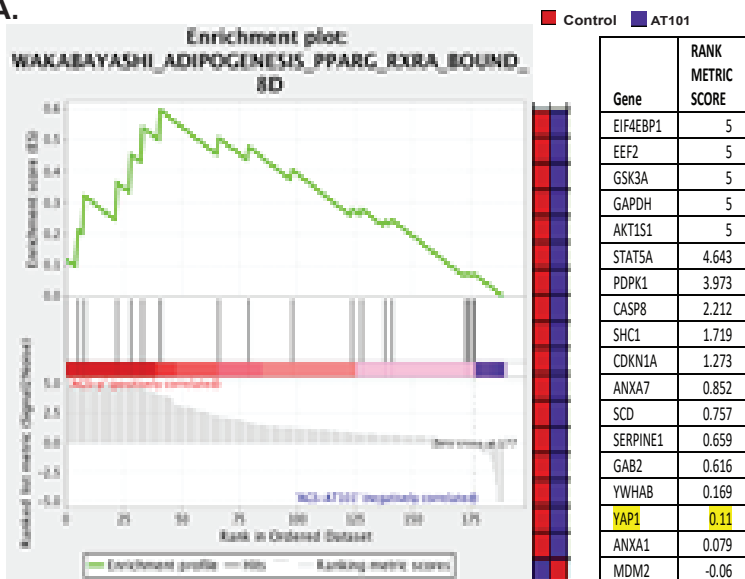

B.

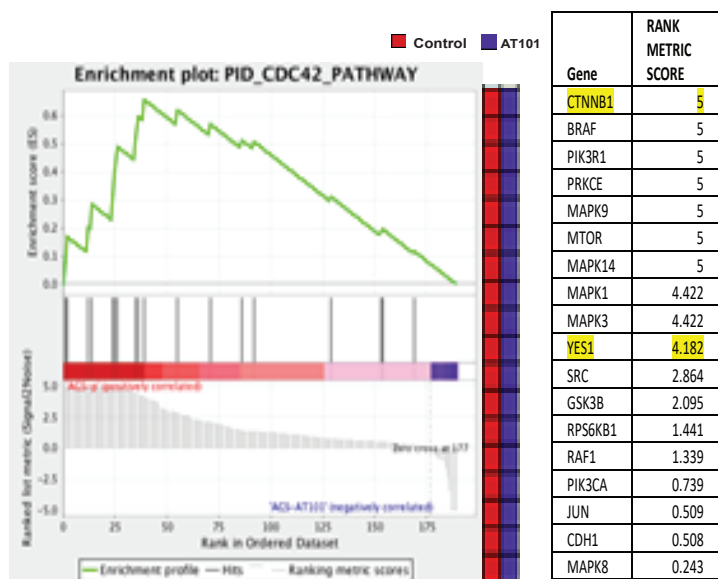

C.

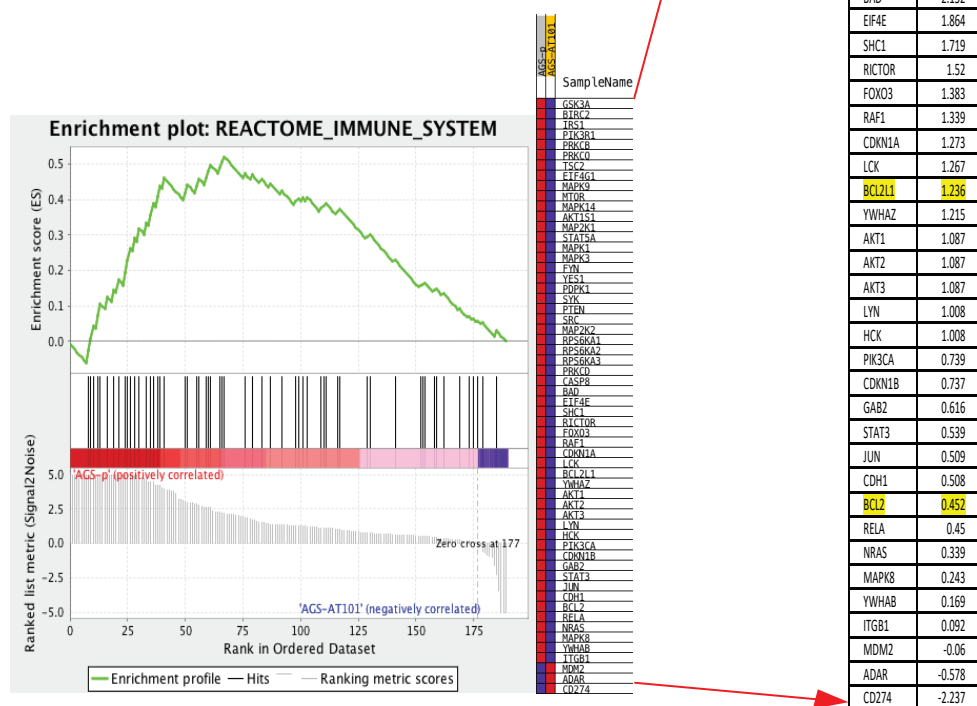

Supplemental Figure 3.

A.

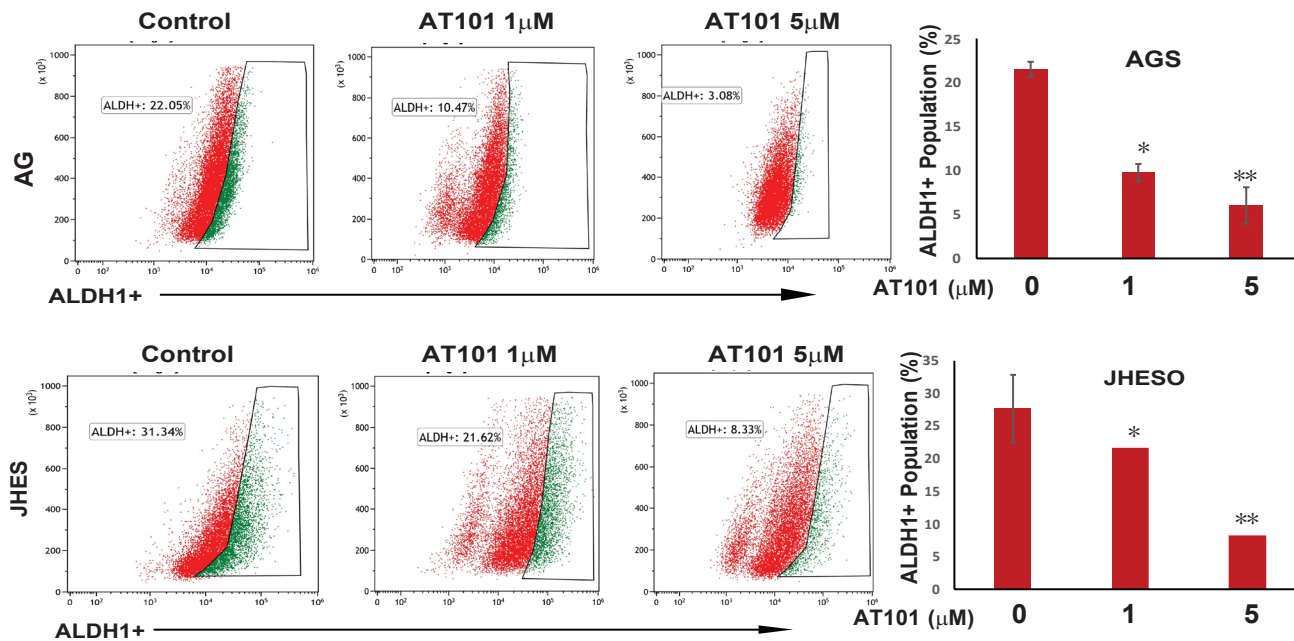

B.

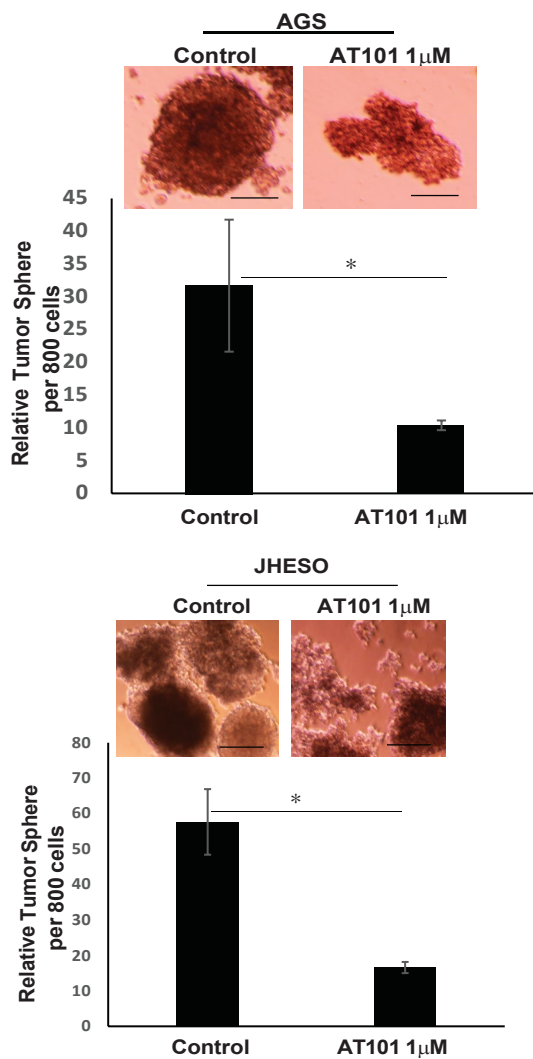

C.

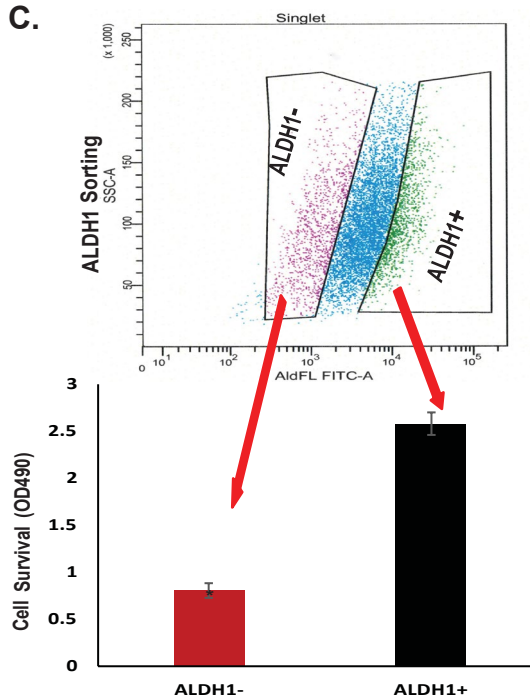

D.

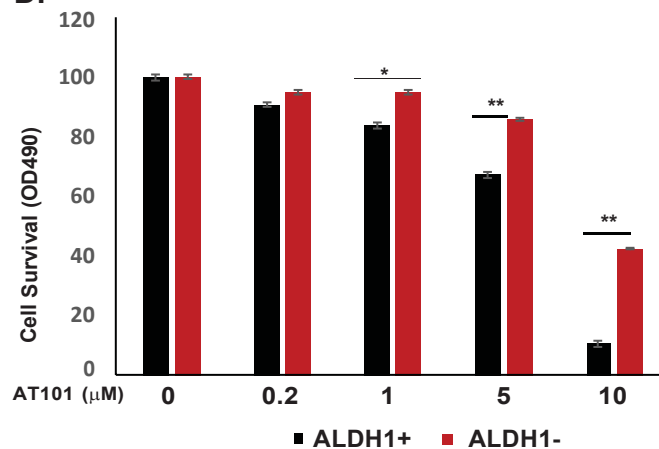

Supplemental Figure 4

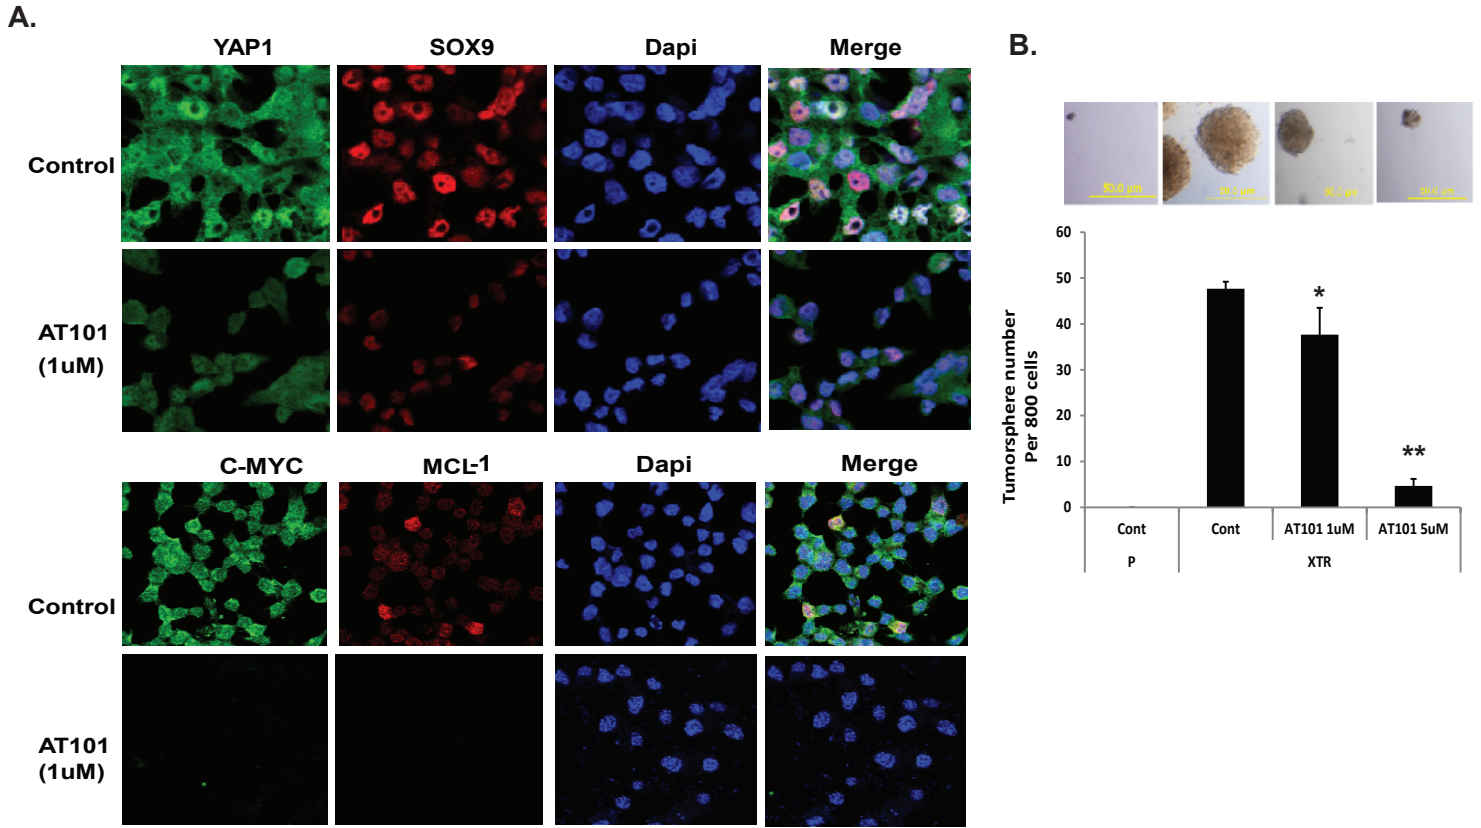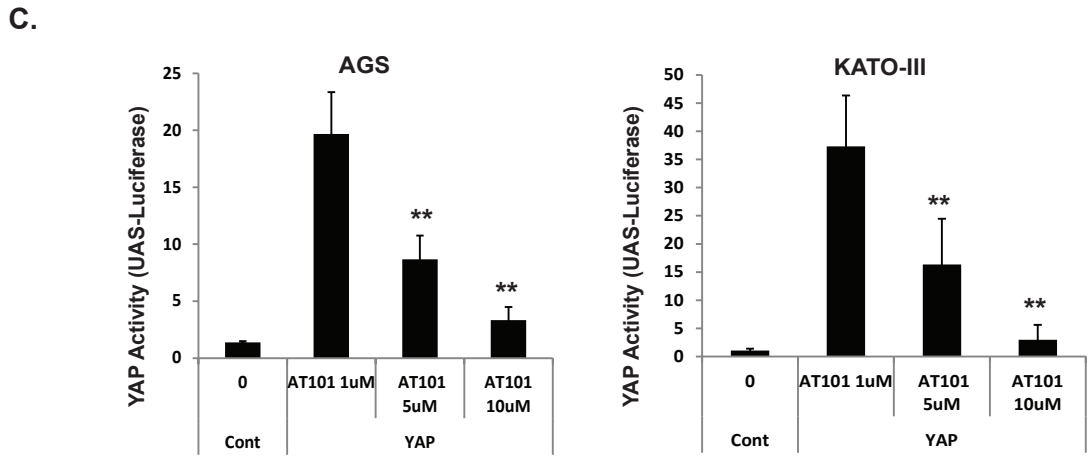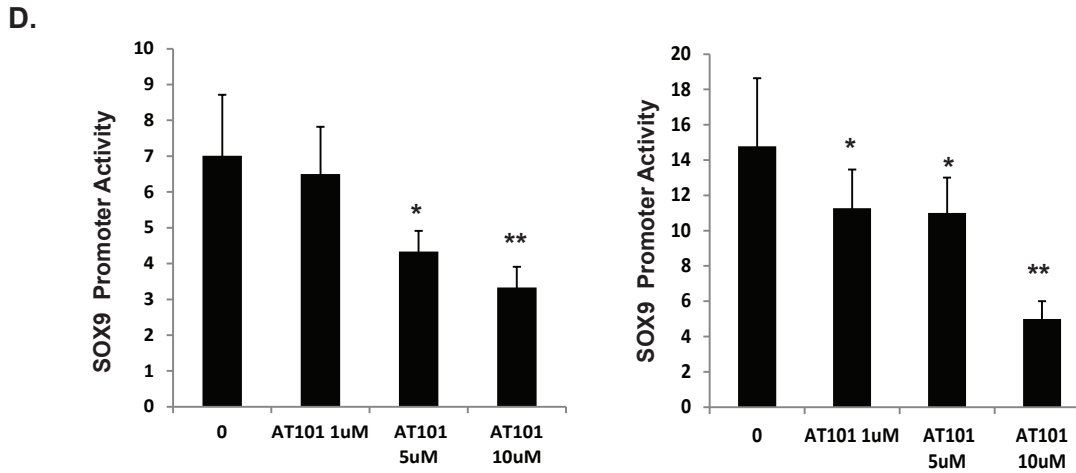

Supplemental Figure 5.

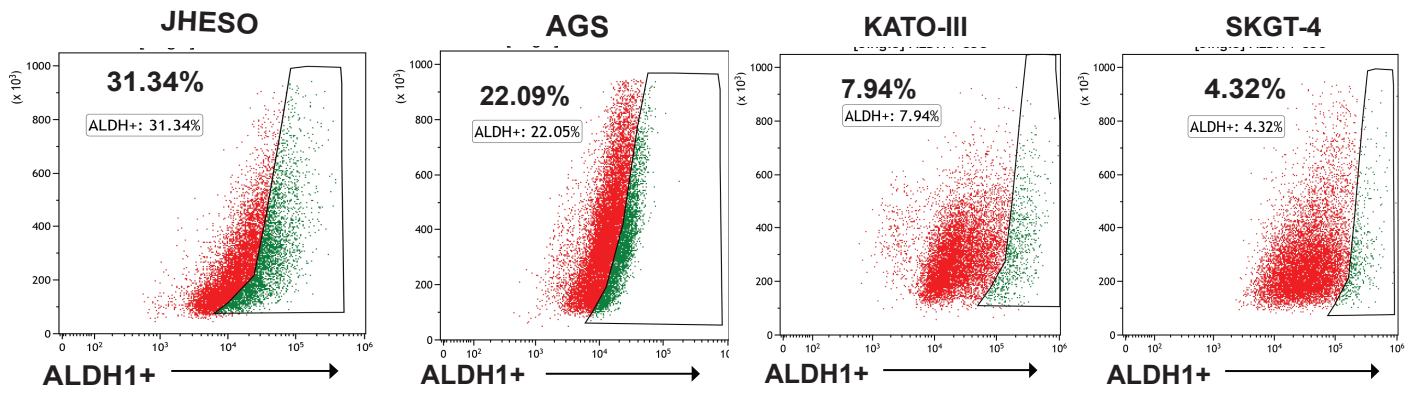

Supplemental Figure 6.

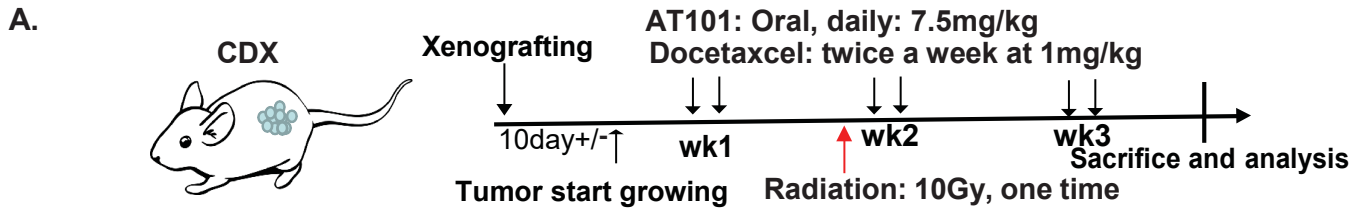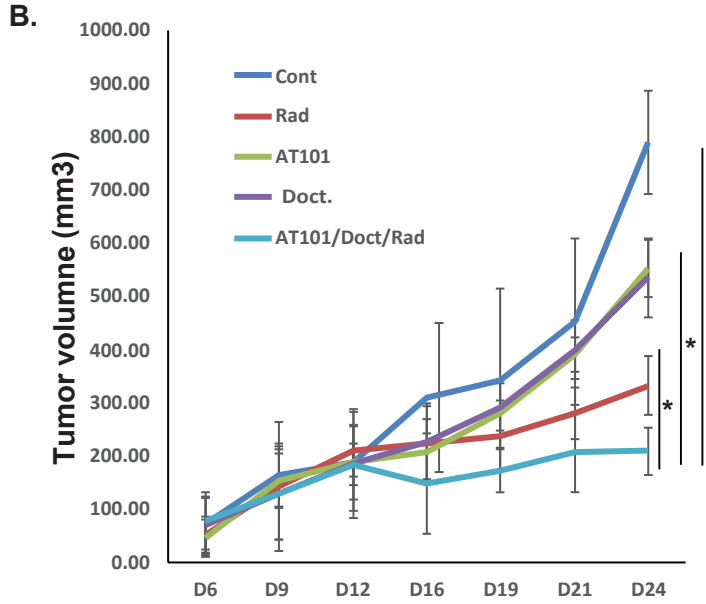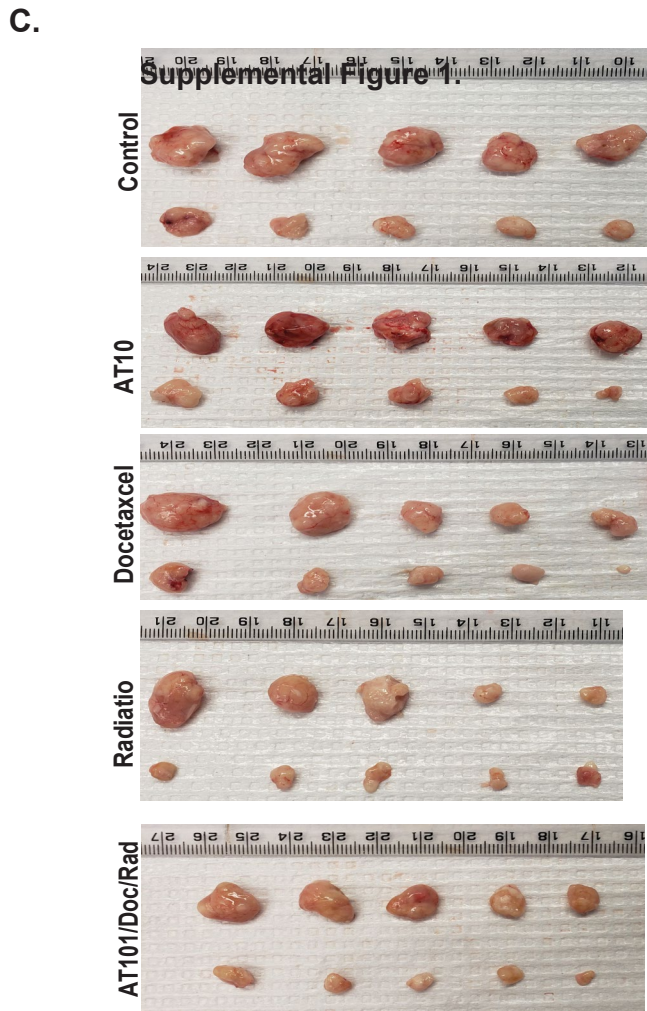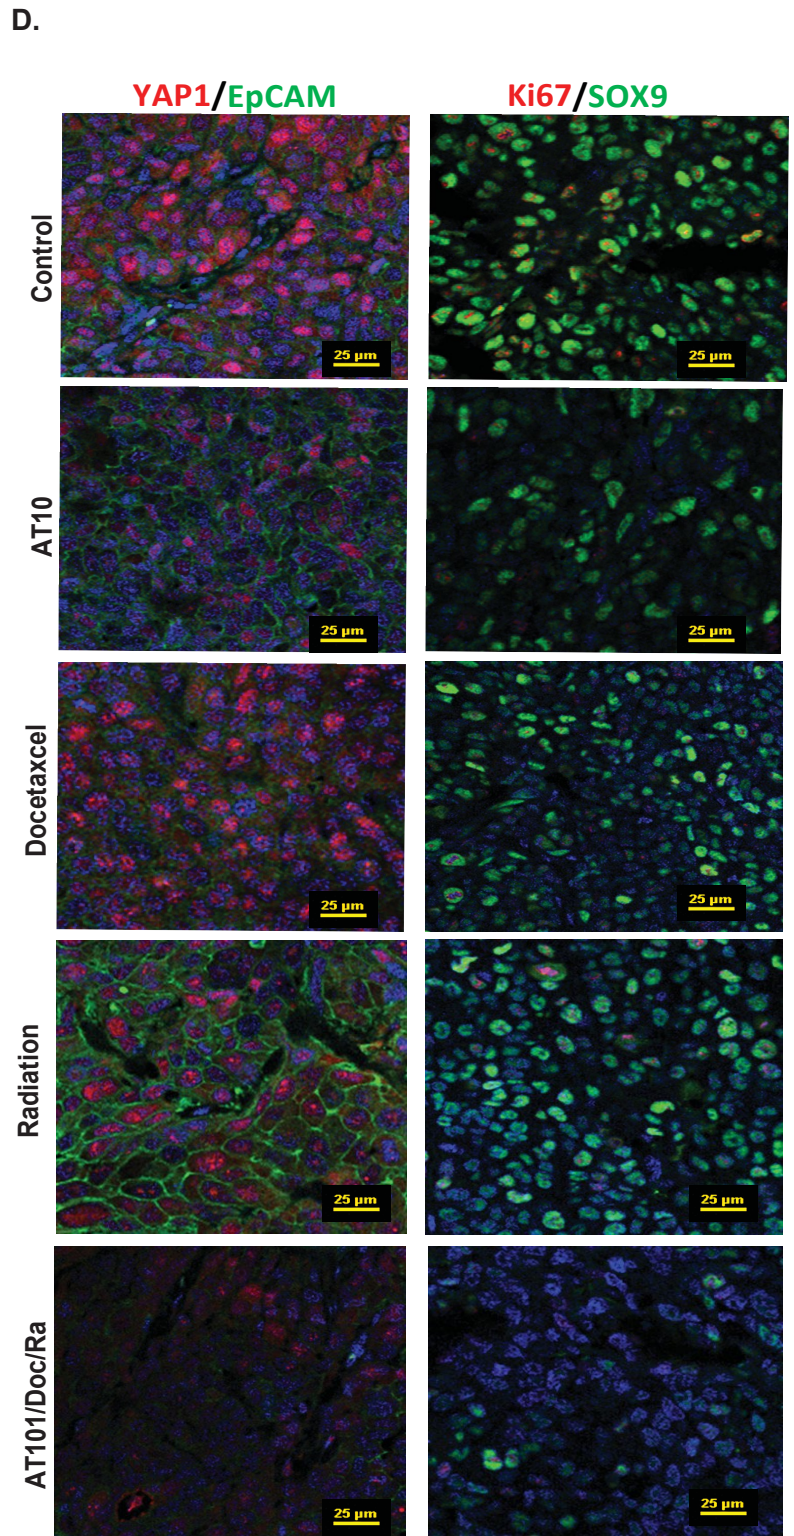

Supplement: NIHMS1852360-supplement-1.pdf [file NIHMS1852360-supplement-1.pdf]
